# Supplementary material for: Highly Sensitive Detection of Bacteria by Binder-Coupled Multifunctional Polymeric Dyes
Source: MDPI journal article supplement (doi:10.3390/polym15122723), 2023-06-18
Supplement: s1 [file s1]

## Supplementary Information

# Highly sensitive detection of bacteria by the binder-coupled multifunctional polymeric dyes

Kriti Kapil <sup>1,†</sup>, Shirley Xu <sup>2,†</sup>, Inseon Lee <sup>2</sup>, Hironobu Murata <sup>1</sup>, Seok-Joon Kwon<sup>2</sup>, Jonathan S. Dordick <sup>2,\*</sup>, and Krzysztof Matyjaszewski <sup>1,\*</sup>

<sup>1</sup>Department of Chemistry, Carnegie Mellon University, 4400 Fifth Avenue, Pittsburgh, PA 15213, United States.

<sup>2</sup>Department of Chemical Engineering, Center for Biotechnology & Interdisciplinary Studies, Rensselaer Polytechnic Institute, Troy, NY 12180, United States.

\* Correspondence: dordick@rpi.edu (J.S.D.); km3b@andrew.cmu.edu (K.M.)

† These authors contributed equally to this work

## Supplementary Information

### Synthesis & characterization of biotinylated copolymeric rhodamine B

The synthesis of biotinylated multifunctional dye-copolymers comprising of zwitterionic, or PEG-backbone was performed using a recently developed fully-oxygen tolerant, photo-catalyzed atom transfer radical polymerization (ATRP) described in the methods section 2.2 of the main text.

The biotinylated copolymer samples were purified by dialysis in deionized water using SpectraPor® 10 kDa cut-off dialysis membrane for 48 h in dark and then lyophilized. The purified samples were characterized by  $^1\text{H}$  NMR spectra (Figures S1 and S2) and then by SEC-MALS (Figure 2a).

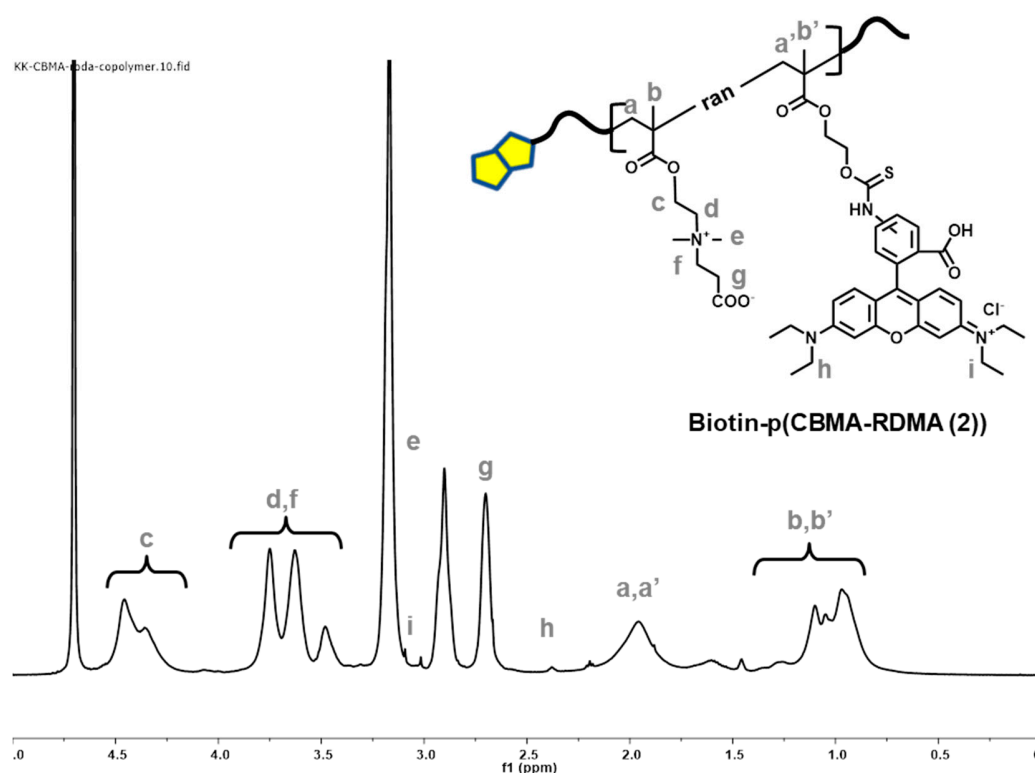

**Figure S1.**  $^1\text{H}$  NMR spectrum of BT-p(CBMA-RDMA) in  $\text{D}_2\text{O}$ .

## Supplementary Information

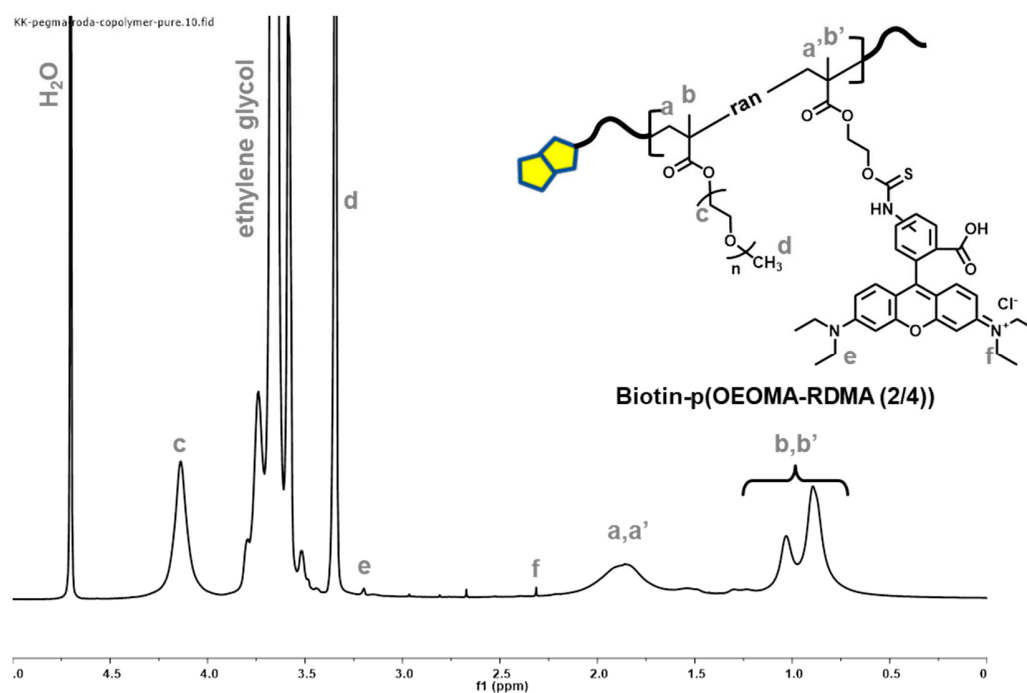

**Figure S2.**  $^1\text{H}$  NMR spectrum of BT-p(OEOMA-RDMA) in  $\text{D}_2\text{O}$ .

### Analysis of polymerization kinetics

The copolymerization kinetics of the photoinduced ATRP was performed under the optimized conditions ( $[\text{OEOMA}_{500}]/[\text{RDMA}]/[\text{SBA}]/[\text{biotin-I}]/[\text{EYH}_2]/[\text{CuBr}_2]/[\text{TPMA}] = 400/4/1/0.02/0.4/1.2$ ). The samples were drawn at regular intervals and monitored by  $^1\text{H}$  NMR in  $\text{D}_2\text{O}$ . A short induction period (10 min) was followed by the rapid polymerization reaching 78 % monomer conversion within 60 min (Figure S3).

## Supplementary Information

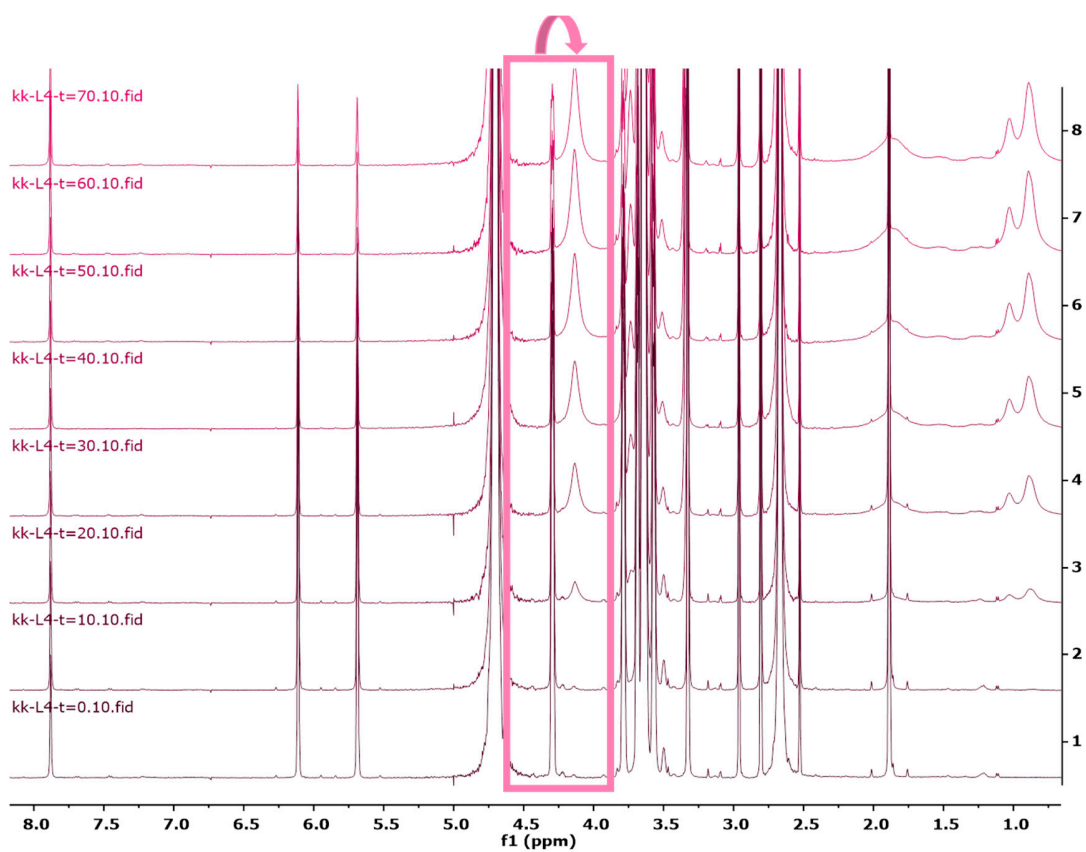

**Figure S3:** Overlapped <sup>1</sup>H NMR spectra showing kinetics of EYH<sub>2</sub>/Cu-catalyzed blue-light induced ATRP for copolymerization of OEOMA<sub>500</sub> & RDMA.

## Supplementary Information

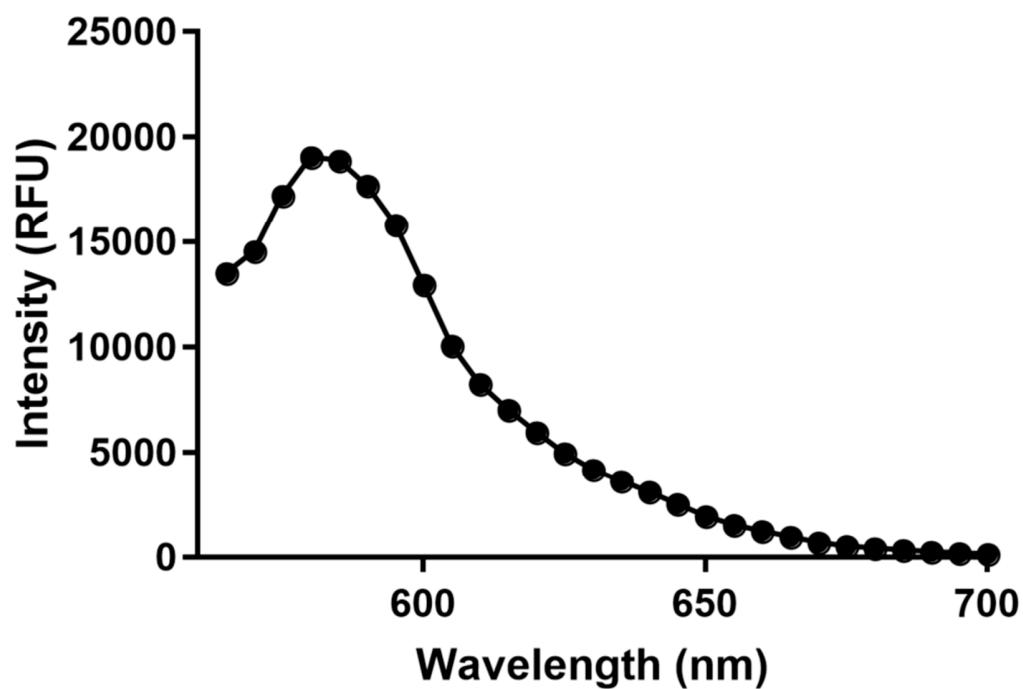

**Figure S4.** Fluorescence spectra of BT-p(OEOMA500-RDMA (4) (5 mg/mL) in PBS. Excitation wavelength is 546 nm.

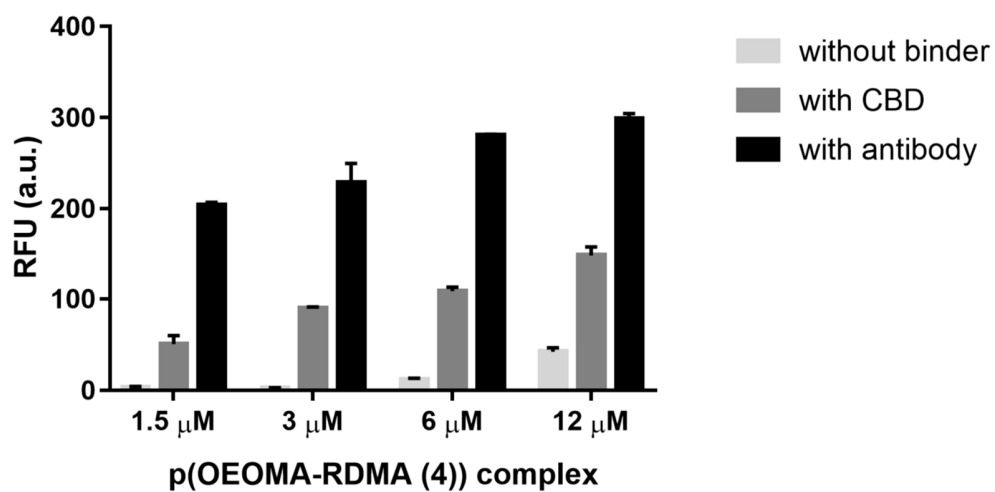

**Figure S5.** Binding test using *S. aureus* cells with various concentrations of antibody/CBD-p(OEOMA500-RDMA (4)) complex.

## Supplementary Information

### Photostability assessment of biotinylated copolymeric rhodamine B

To assess the stability of biotinylated copolymer rhodamine B, the fluorescence intensity of the synthesized copolymers was monitored overnight ( $[BT-p(OEOMA_{500}-RDMA\ (4))] = 60\ \mu M$ ) in a plate reader at  $37\ ^\circ C$  as described in section 2.5.

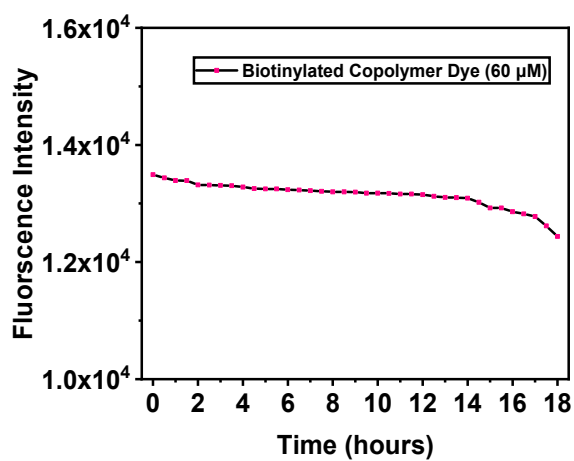

**Figure S6.** Evolution of the fluorescence intensity of BT-p(OEOMA<sub>500</sub>-RDMA (4)) (60  $\mu M$ ) overnight ( $37\ ^\circ C$ , in 1X PBS Buffer).
